# Supplementary material
Source: Research Square preprint supplement (doi:10.21203/rs.3.rs-8669205/v1)
Supplement: Supplementary file 1 [file 3ea54837e4380da28b81c021.docx]

**TableS1**

| name | Average Shortest Path Length | Betweenness Centrality | Closeness Centrality | Clustering Coefficient | Degree |
| --- | --- | --- | --- | --- | --- |
| SACM1L | 1.0926 | 0.1221 | 0.9153 | 0.5782 | 49 |
| PI4K2B | 1.1111 | 0.0697 | 0.9000 | 0.6082 | 48 |
| GNPAT | 1.1296 | 0.0407 | 0.8852 | 0.6318 | 47 |
| CEPT1 | 1.1296 | 0.0326 | 0.8852 | 0.6346 | 47 |
| DDHD1 | 1.1481 | 0.0211 | 0.8710 | 0.6609 | 46 |
| ABHD3 | 1.1667 | 0.0511 | 0.8571 | 0.6727 | 45 |
| PIK3CB | 1.1667 | 0.0172 | 0.8571 | 0.6838 | 45 |
| MTMR6 | 1.1667 | 0.0172 | 0.8571 | 0.6838 | 45 |
| PLD1 | 1.1852 | 0.0141 | 0.8438 | 0.7040 | 44 |
| ETNK1 | 1.1852 | 0.0141 | 0.8438 | 0.7040 | 44 |
| LYPLA1 | 1.2037 | 0.0106 | 0.8308 | 0.7298 | 43 |
| MTM1 | 1.2037 | 0.0252 | 0.8308 | 0.7165 | 43 |
| PIK3CA | 1.2037 | 0.0106 | 0.8308 | 0.7298 | 43 |
| RAB5A | 1.2037 | 0.0130 | 0.8308 | 0.7165 | 43 |
| PLEKHA3 | 1.2222 | 0.0092 | 0.8182 | 0.7503 | 42 |
| OSBPL8 | 1.2593 | 0.0068 | 0.7941 | 0.7897 | 40 |
| PIKFYVE | 1.2593 | 0.0068 | 0.7941 | 0.7897 | 40 |
| CPNE3 | 1.3148 | 0.0045 | 0.7606 | 0.8393 | 37 |
| RAB14 | 1.3333 | 0.0036 | 0.7500 | 0.8603 | 36 |
| SYNJ1 | 1.3333 | 0.0037 | 0.7500 | 0.8603 | 36 |
| SLC44A1 | 1.3889 | 0.0015 | 0.7200 | 0.9261 | 33 |
| INPP5F | 1.3889 | 0.0014 | 0.7200 | 0.9280 | 33 |
| PIK3C2A | 1.3889 | 0.0014 | 0.7200 | 0.9261 | 33 |
| MTMR9 | 1.4074 | 0.0010 | 0.7105 | 0.9476 | 32 |
| PIK3CG | 1.4074 | 0.0009 | 0.7105 | 0.9496 | 32 |
| GPCPD1 | 1.4444 | 0.0012 | 0.6923 | 0.9355 | 31 |
| CPNE6 | 1.4259 | 0.0450 | 0.7013 | 0.8129 | 31 |
| LPGAT1 | 1.5000 | 0.0002 | 0.6667 | 0.9841 | 28 |
| HADHB | 1.5185 | 0.0002 | 0.6585 | 0.9801 | 27 |
| PTEN | 1.5185 | 0.0000 | 0.6585 | 1.0000 | 27 |
| PLEKHA2 | 1.5185 | 0.0000 | 0.6585 | 1.0000 | 26 |
| PITPNB | 1.5370 | 0.0000 | 0.6506 | 1.0000 | 26 |
| MTMR12 | 1.5556 | 0.0007 | 0.6429 | 0.9529 | 24 |
| PIK3R1 | 1.6111 | 0.0000 | 0.6207 | 1.0000 | 22 |
| PLA2G4A | 1.6296 | 0.0000 | 0.6136 | 1.0000 | 21 |
| LPCAT2 | 1.6481 | 0.0000 | 0.6067 | 1.0000 | 20 |
| FIG4 | 1.6481 | 0.0000 | 0.6067 | 1.0000 | 20 |
| DGKQ | 1.6667 | 0.0000 | 0.6000 | 1.0000 | 19 |
| PIP5K1A | 1.6667 | 0.0000 | 0.6000 | 1.0000 | 19 |
| CHKB | 1.6852 | 0.0000 | 0.5934 | 1.0000 | 18 |
| AGPAT1 | 1.7037 | 0.0000 | 0.5870 | 1.0000 | 16 |
| AGPAT3 | 1.7037 | 0.0000 | 0.5870 | 1.0000 | 16 |
| PNPLA8 | 1.7407 | 0.0000 | 0.5745 | 1.0000 | 15 |
| AGK | 1.7778 | 0.0000 | 0.5625 | 1.0000 | 14 |
| SLC44A2 | 1.7778 | 0.0000 | 0.5625 | 1.0000 | 13 |
| PCTP | 1.9259 | 0.0000 | 0.5192 | 1.0000 | 8 |
| STARD7 | 1.9259 | 0.0000 | 0.5192 | 1.0000 | 6 |
| MFSD2A | 1.9815 | 0.0000 | 0.5047 | 1.0000 | 3 |
| PIP4K2B | 2.0370 | 0.0000 | 0.4909 | 1.0000 | 3 |
| PIK3R4 | 2.0556 | 0.0000 | 0.4865 | 1.0000 | 2 |
| GPD2 | 2.1481 | 0.0000 | 0.4655 | 0.0000 | 1 |
| PIP5K1C | 2.4074 | 0.0000 | 0.4154 | 0.0000 | 1 |
| PLEKHA8 | 2.0926 | 0.0000 | 0.4779 | 0.0000 | 1 |
| PIK3C2B | 2.0741 | 0.0000 | 0.4821 | 0.0000 | 1 |
| MBOAT7 | 1.0000 | 0.0000 | 1.0000 | 0.0000 | 1 |
| DGAT2 | 1.0000 | 0.0000 | 1.0000 | 0.0000 | 1 |
| PIK3R3 | 2.0741 | 0.0000 | 0.4821 | 0.0000 | 1 |

**Table S2**

| Gene | Fold change | Average (Asthma) | P value | Average (Healthy) |
| --- | --- | --- | --- | --- |
| ABHD3 | 0.2369 | 1.9699 | 1.009E-10 | 8.3154 |
| AGPAT1 | 2.3232 | 0.3042 | 1.009E-10 | 0.1309 |
| AGPAT3 | 1.7596 | 2.3519 | 2.243E-12 | 1.3367 |
| CEPT1 | 0.4993 | 1.1847 | 4.410E-08 | 2.3730 |
| CHKB | 0.4023 | 1.4815 | 4.261E-11 | 3.6828 |
| CPNE6 | 1.4995 | 1.8587 | 4.512E-09 | 1.2395 |
| DDHD1 | 0.3607 | 3.2550 | 3.481E-09 | 9.0250 |
| ETNK1 | 0.3134 | 1.2774 | 6.577E-08 | 4.0763 |
| FIG4 | 0.5472 | 19.4502 | 4.242E-06 | 35.5476 |
| GNPAT | 0.4519 | 0.7919 | 2.660E-09 | 1.7522 |
| GPCPD1 | 0.3988 | 9.7526 | 9.664E-08 | 24.4527 |
| HADHB | 0.5649 | 1.9833 | 4.512E-09 | 3.5111 |
| INPP5F | 0.6131 | 0.7397 | 1.383E-06 | 1.2065 |
| LPCAT2 | 0.5081 | 1.9126 | 2.121E-05 | 3.7640 |
| LPGAT1 | 0.5812 | 1.2461 | 2.121E-05 | 2.1442 |
| LYPLA1 | 0.2839 | 0.6637 | 1.009E-10 | 2.3376 |
| MFSD2A | 1.3864 | 1.7886 | 4.242E-06 | 1.2901 |
| MTM1 | 0.4750 | 2.2493 | 3.239E-06 | 4.7350 |
| MTMR6 | 0.3691 | 2.4971 | 8.804E-07 | 6.7659 |
| MTMR9 | 0.6115 | 1.2005 | 6.446E-07 | 1.9631 |
| OSBPL8 | 0.4877 | 2.0670 | 5.139E-05 | 4.2384 |
| PCTP | 0.7557 | 1.7428 | 1.680E-05 | 2.3060 |
| PI4K2B | 0.3979 | 0.9457 | 6.446E-07 | 2.3767 |
| PIK3CA | 0.3726 | 0.7433 | 2.348E-08 | 1.9951 |
| PIK3CB | 0.5015 | 2.0458 | 1.039E-05 | 4.0795 |
| PIK3CG | 0.6019 | 2.8116 | 6.343E-05 | 4.6712 |
| PIK3R1 | 0.5882 | 1.9150 | 7.797E-05 | 3.2556 |
| PIKFYVE | 0.5096 | 1.0876 | 5.497E-07 | 2.1344 |
| PIP4K2B | 2.9560 | 1.5865 | 2.981E-05 | 0.5367 |
| PITPNB | 0.6629 | 0.9332 | 2.005E-07 | 1.4079 |
| PLA2G4A | 0.5816 | 0.7375 | 2.823E-06 | 1.2681 |
| PLD1 | 0.3983 | 1.5705 | 1.518E-09 | 3.9426 |
| PLEKHA2 | 0.5130 | 1.7048 | 7.542E-07 | 3.3231 |
| PLEKHA3 | 0.4485 | 1.6927 | 1.601E-06 | 3.7737 |
| PNPLA8 | 0.6940 | 2.4566 | 4.676E-07 | 3.5400 |
| PTEN | 0.5645 | 0.9694 | 4.843E-06 | 1.7174 |
| RAB14 | 0.4046 | 2.0925 | 1.507E-08 | 5.1721 |
| RAB5A | 0.4096 | 0.7247 | 5.817E-09 | 1.7691 |
| SACM1L | 0.4034 | 1.8296 | 2.823E-06 | 4.5354 |
| SLC44A1 | 0.4916 | 1.1907 | 6.446E-07 | 2.4221 |
| SLC44A2 | 2.5343 | 3.3265 | 2.836E-07 | 1.3126 |
| SYNJ1 | 0.5287 | 2.7153 | 9.547E-05 | 5.1362 |

**Full uncropped Gels and Blots image**

**FIG4**

**
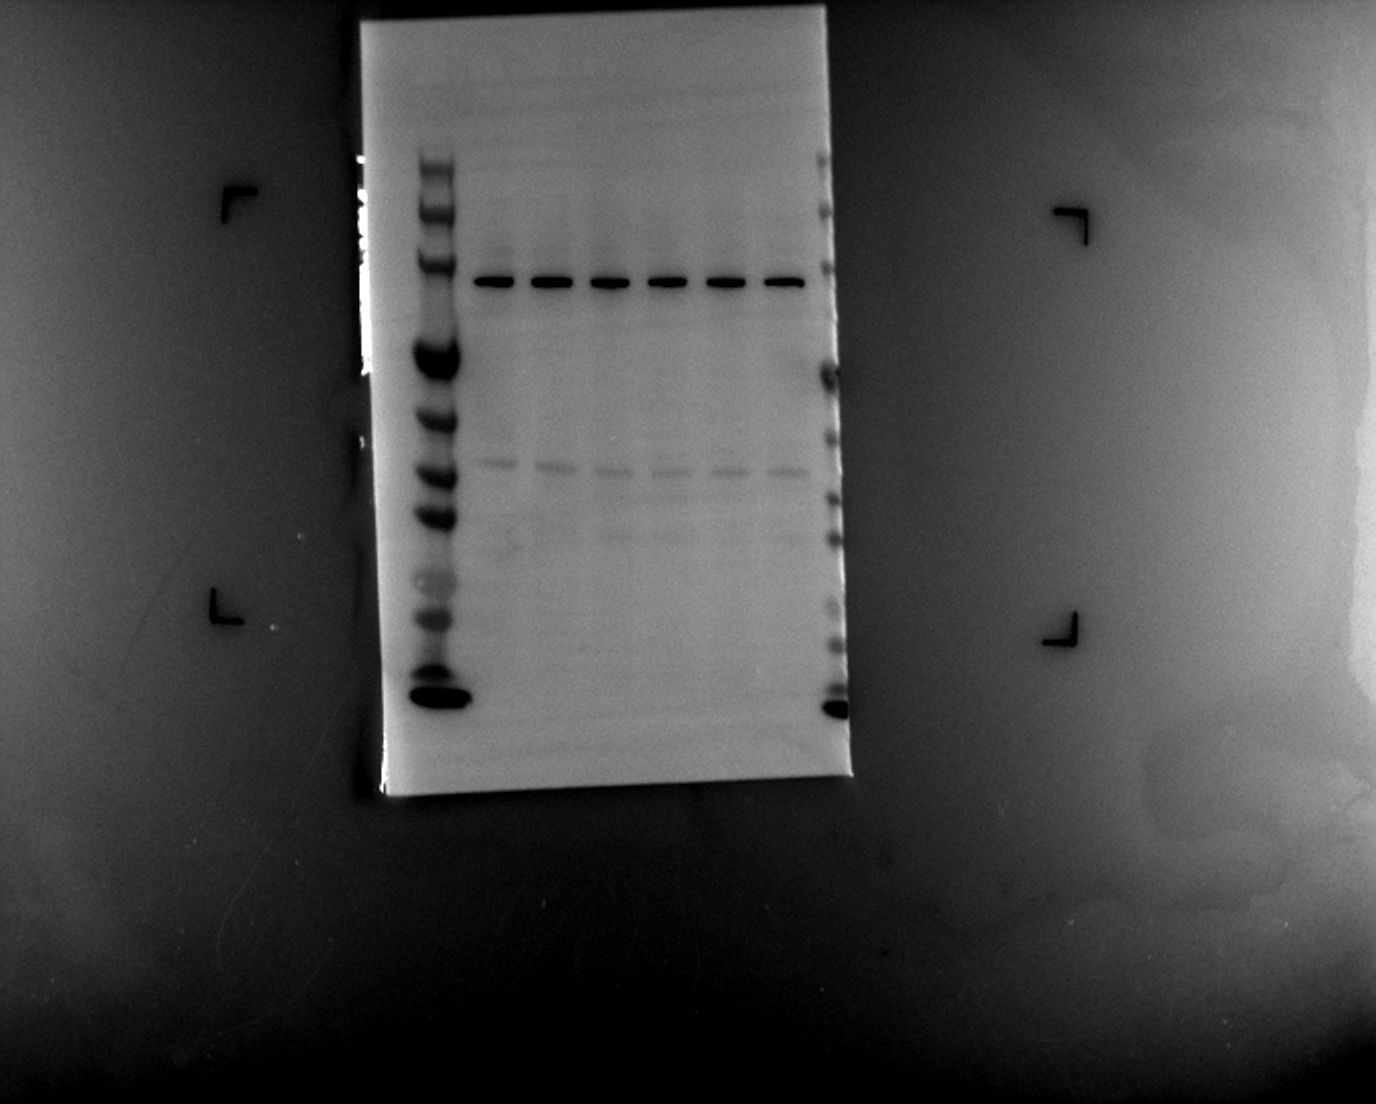

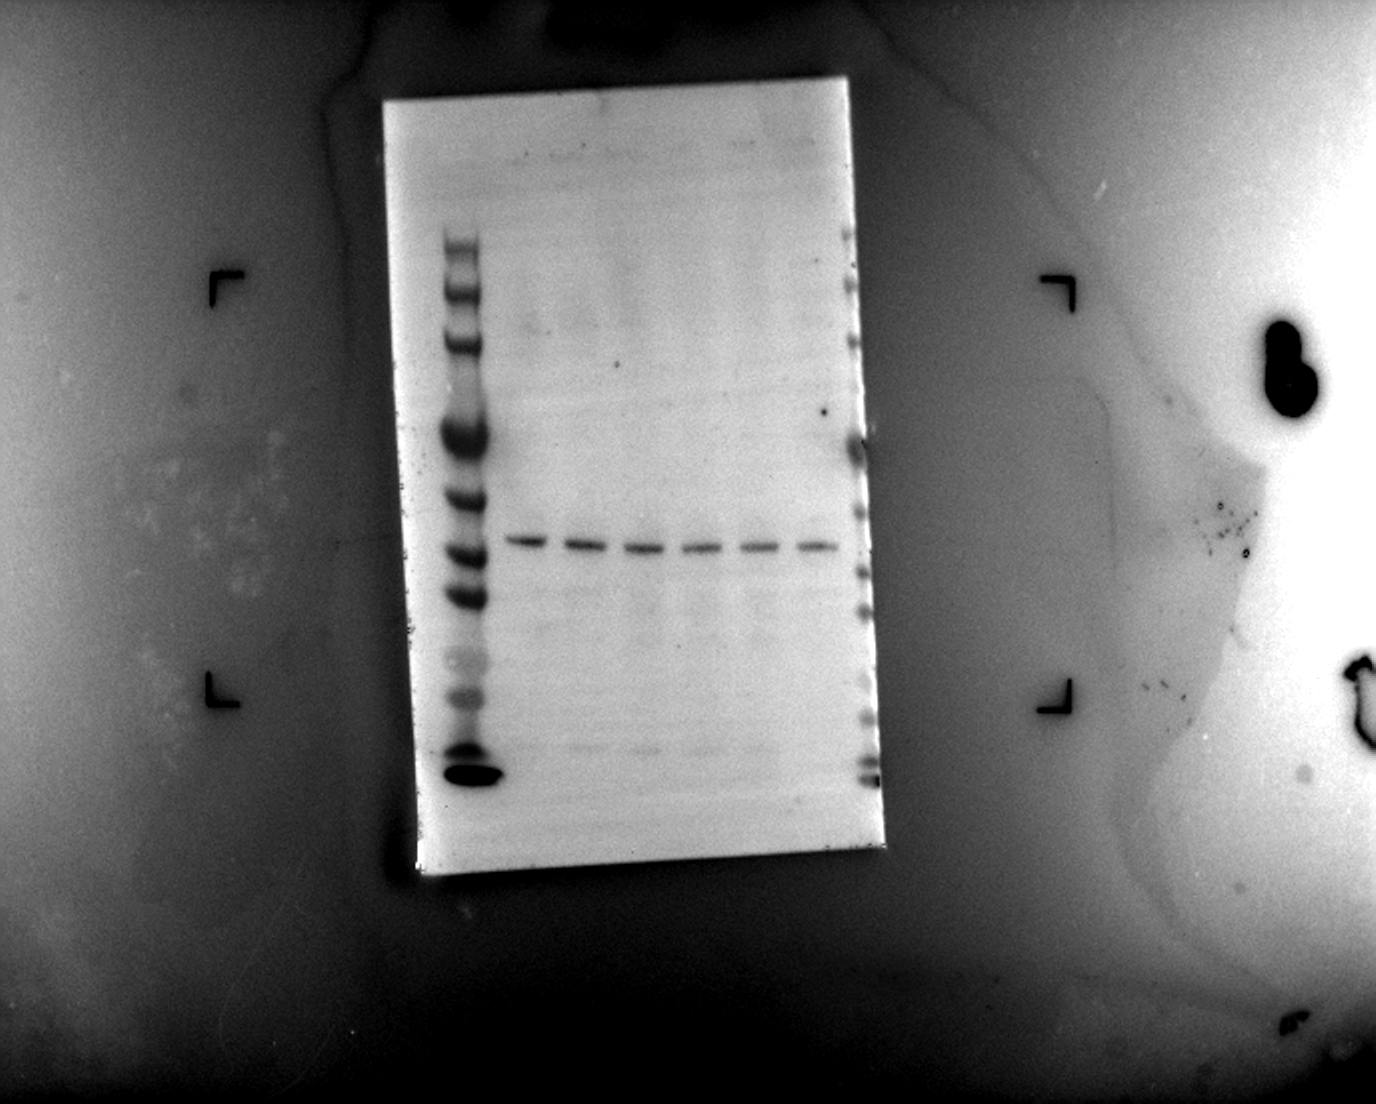
**

**MFSD2A**

**
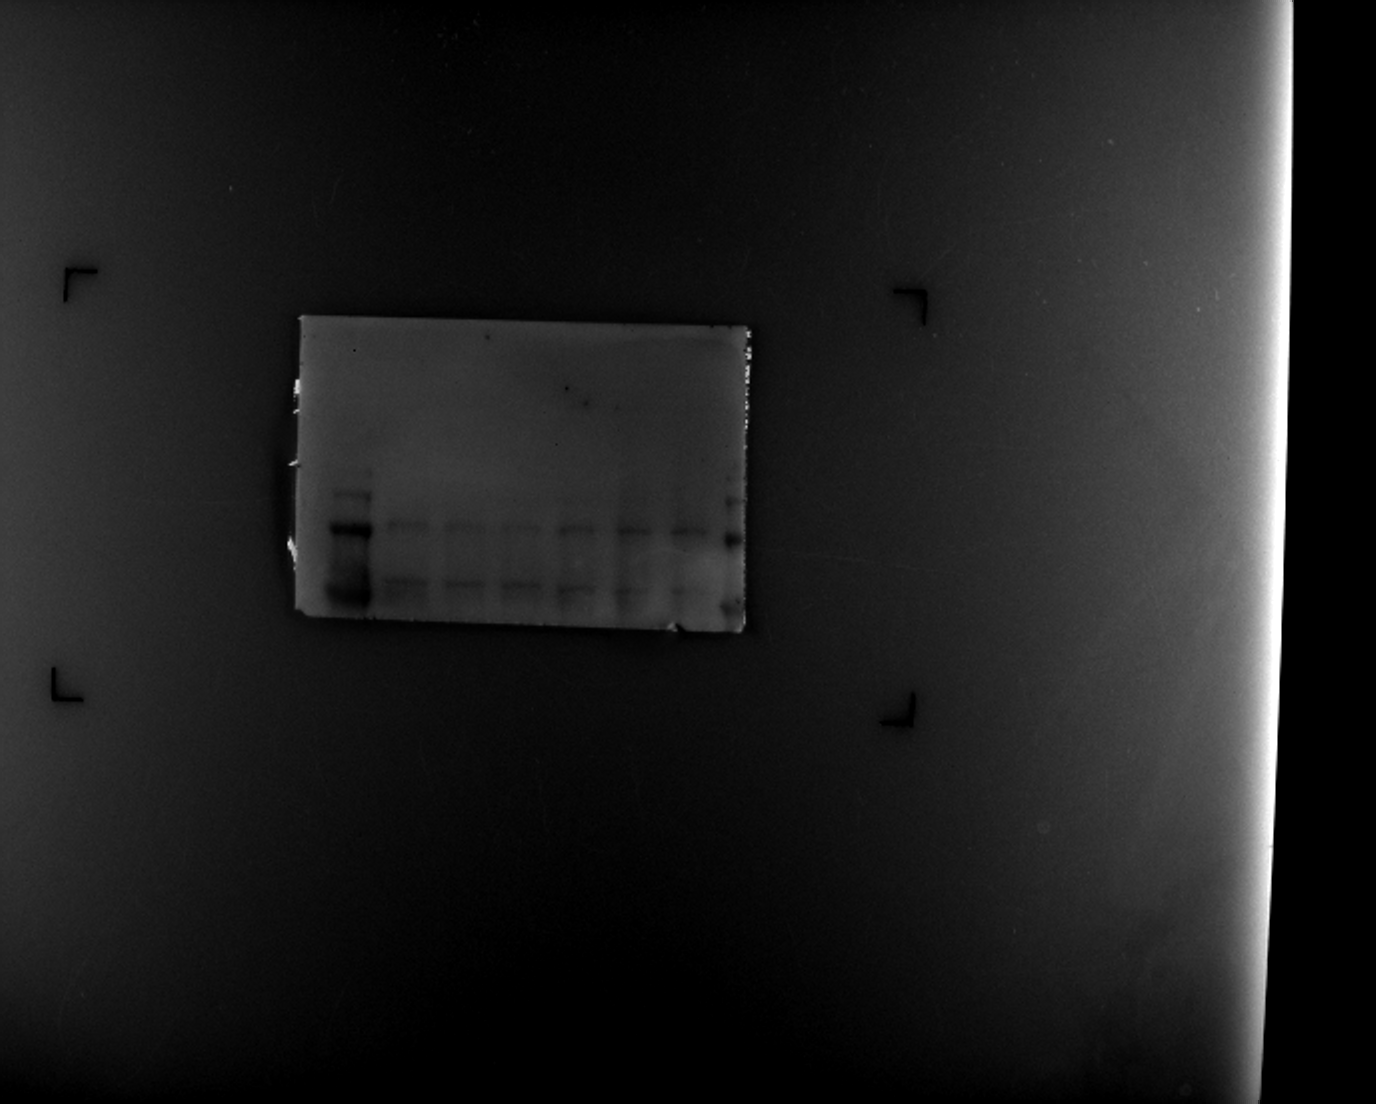

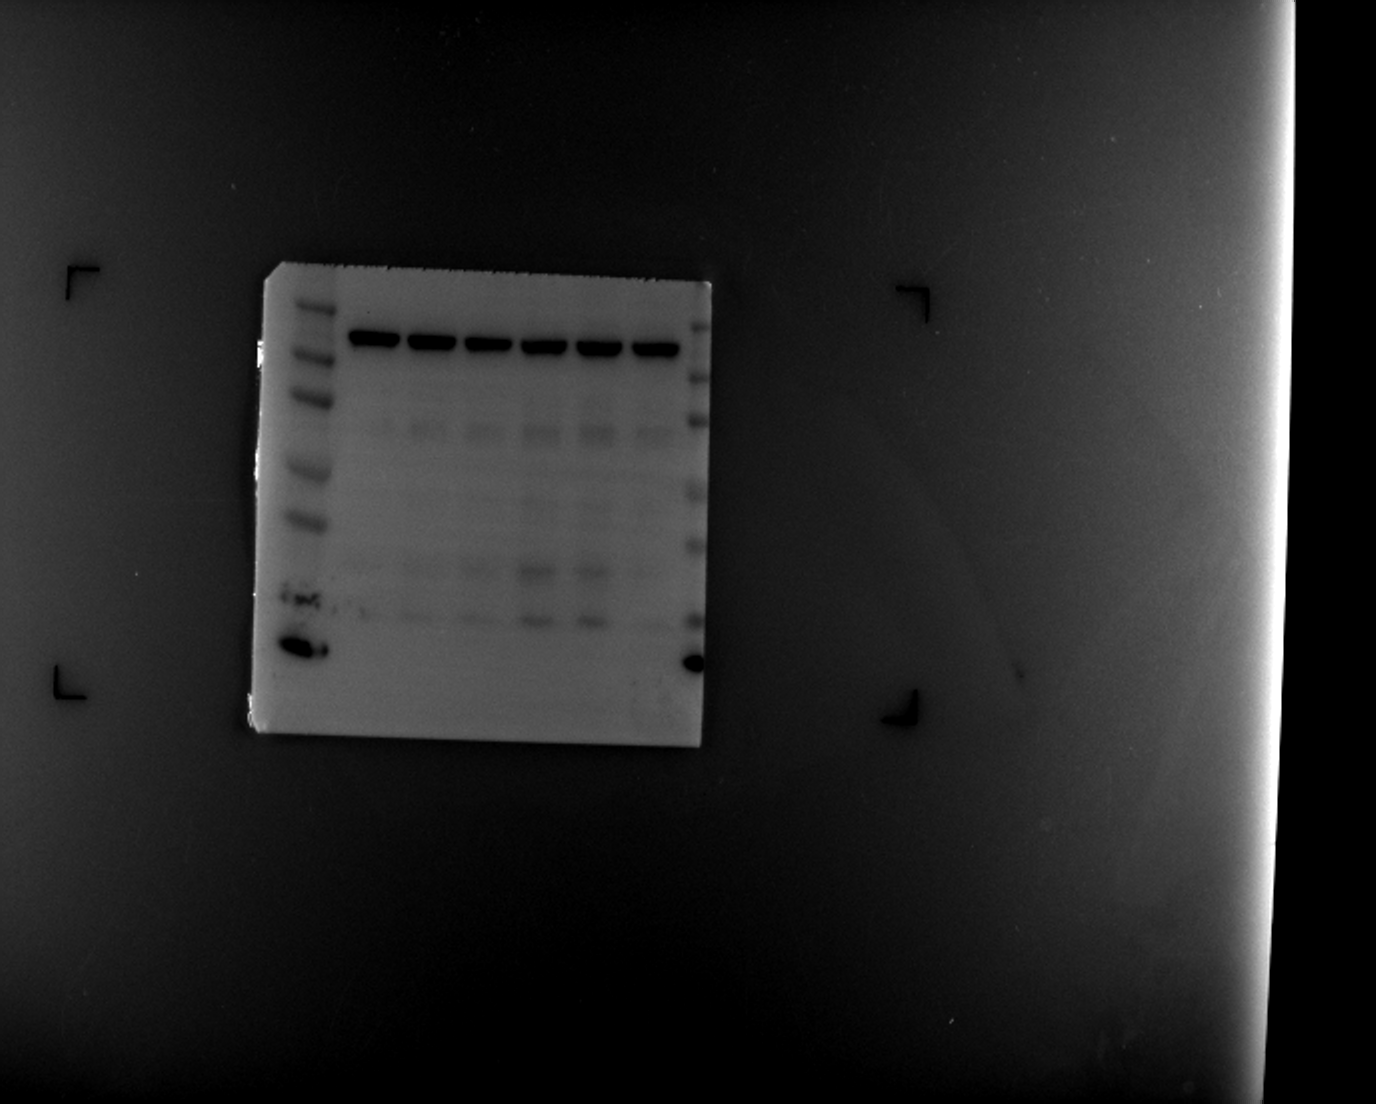
**

**HADHB**

**
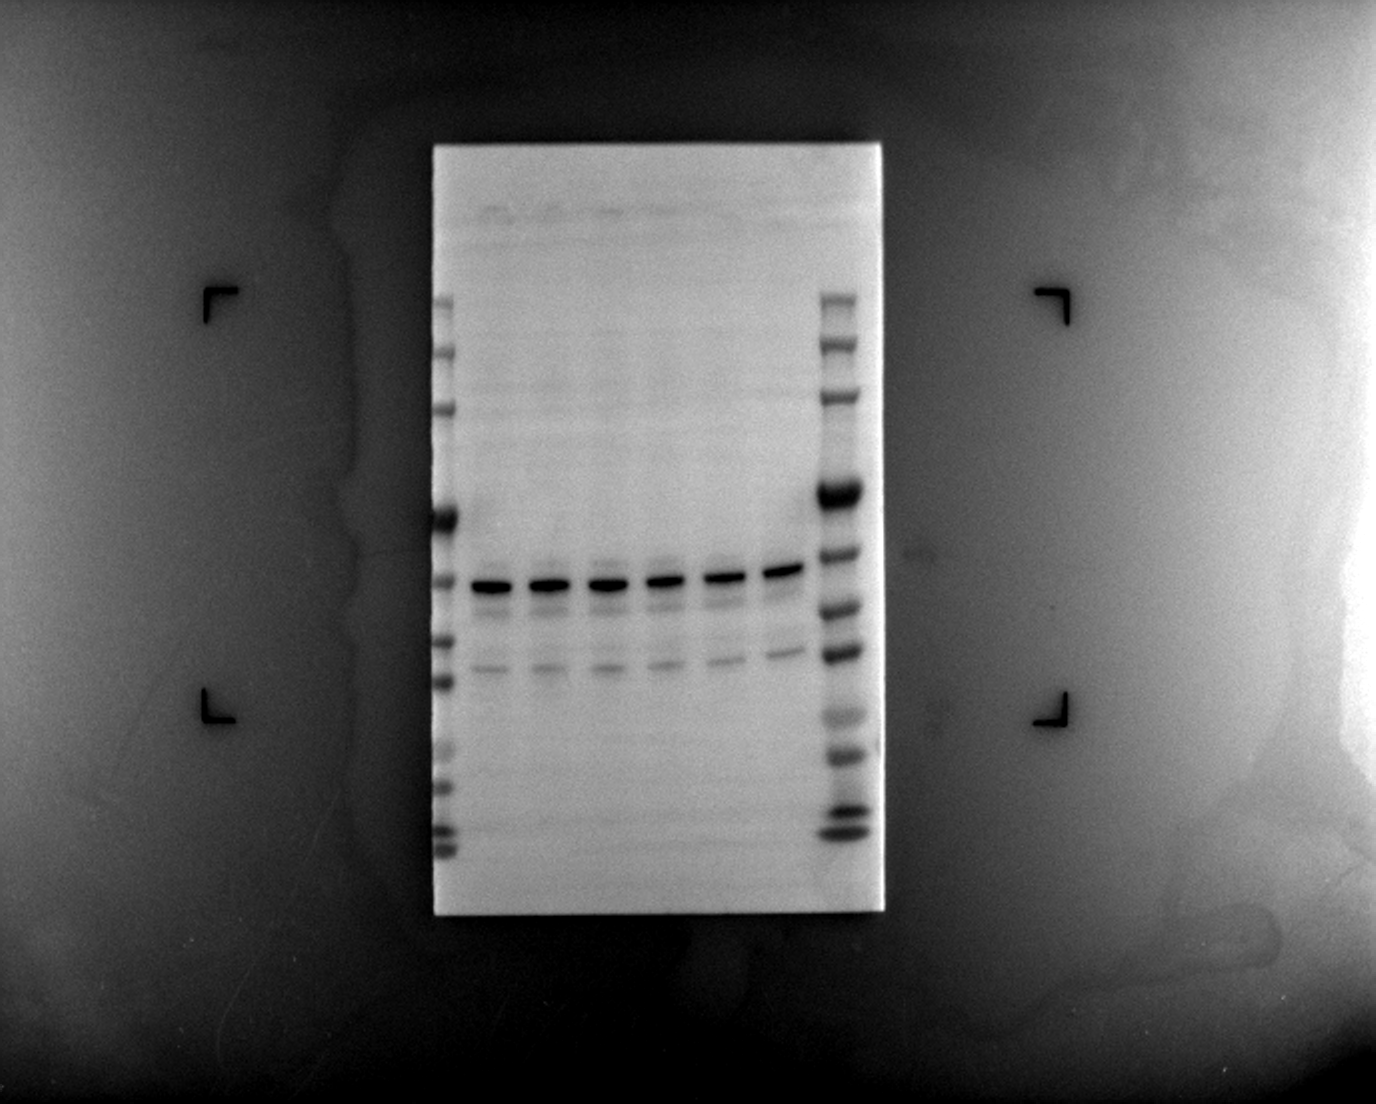

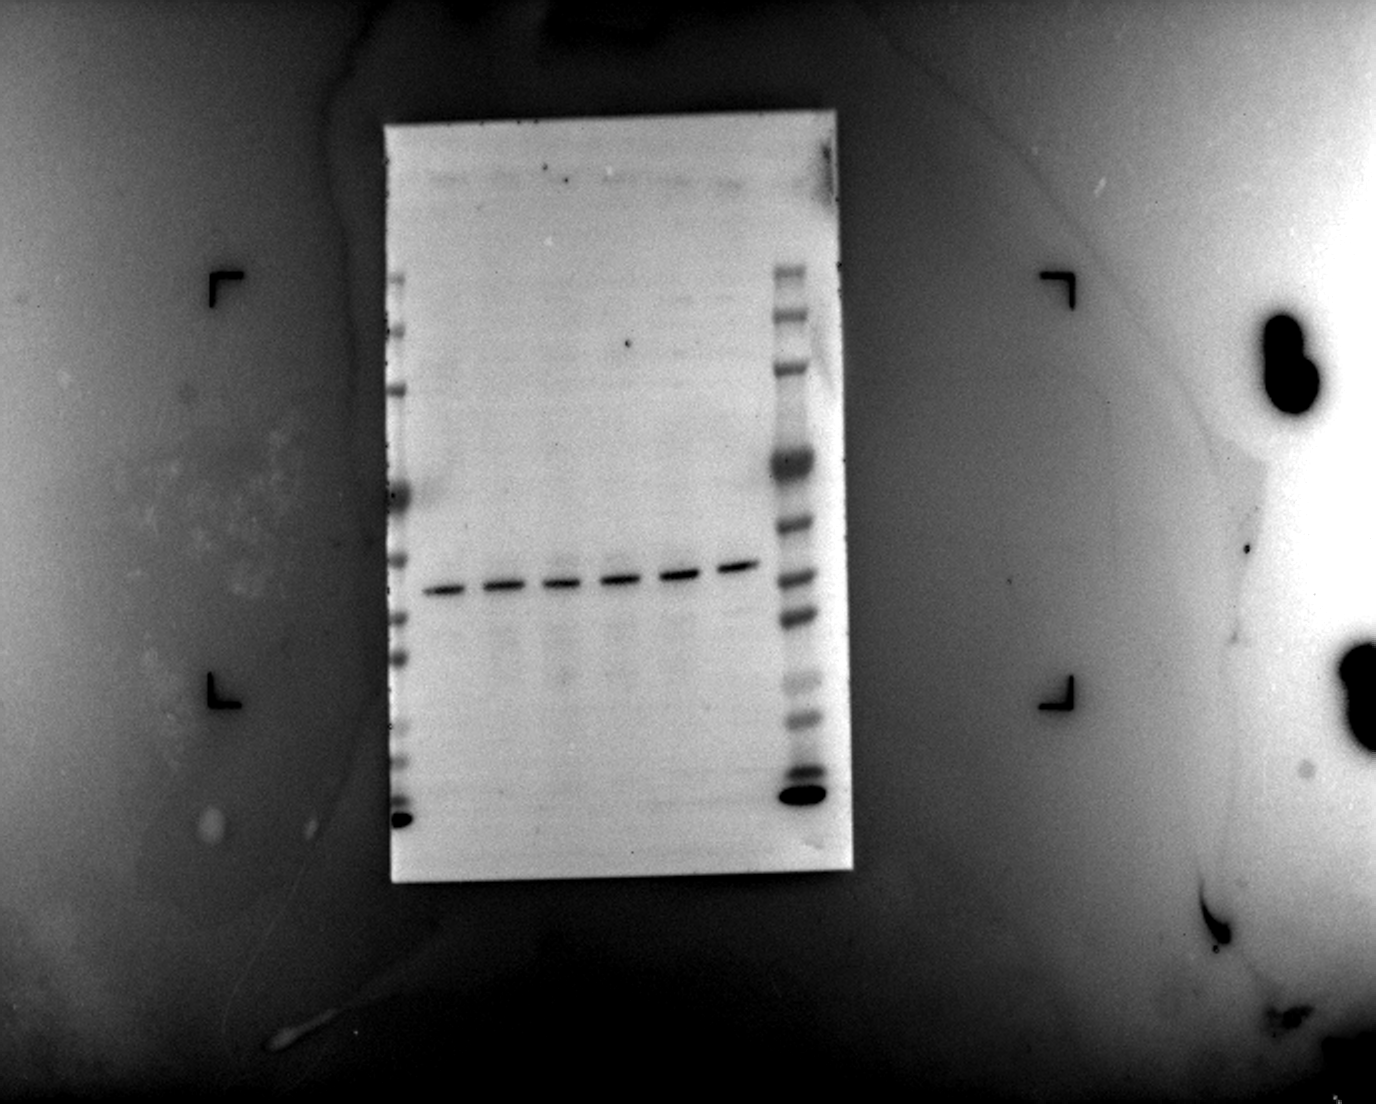
**

**PCTP**

**
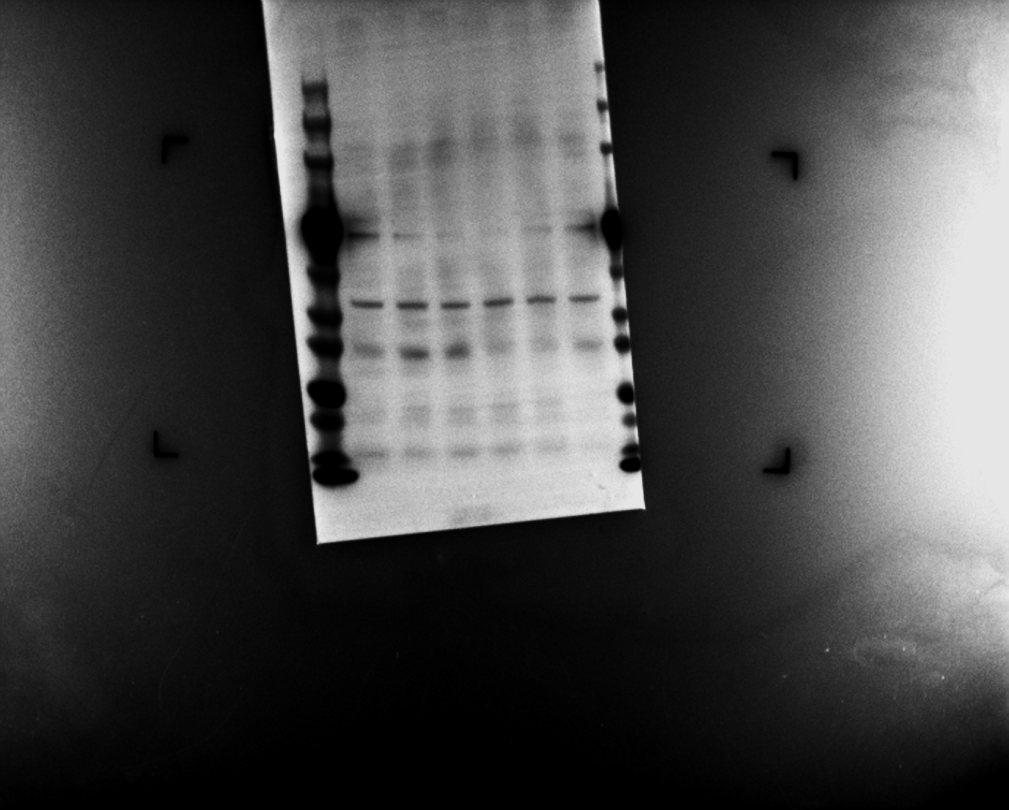

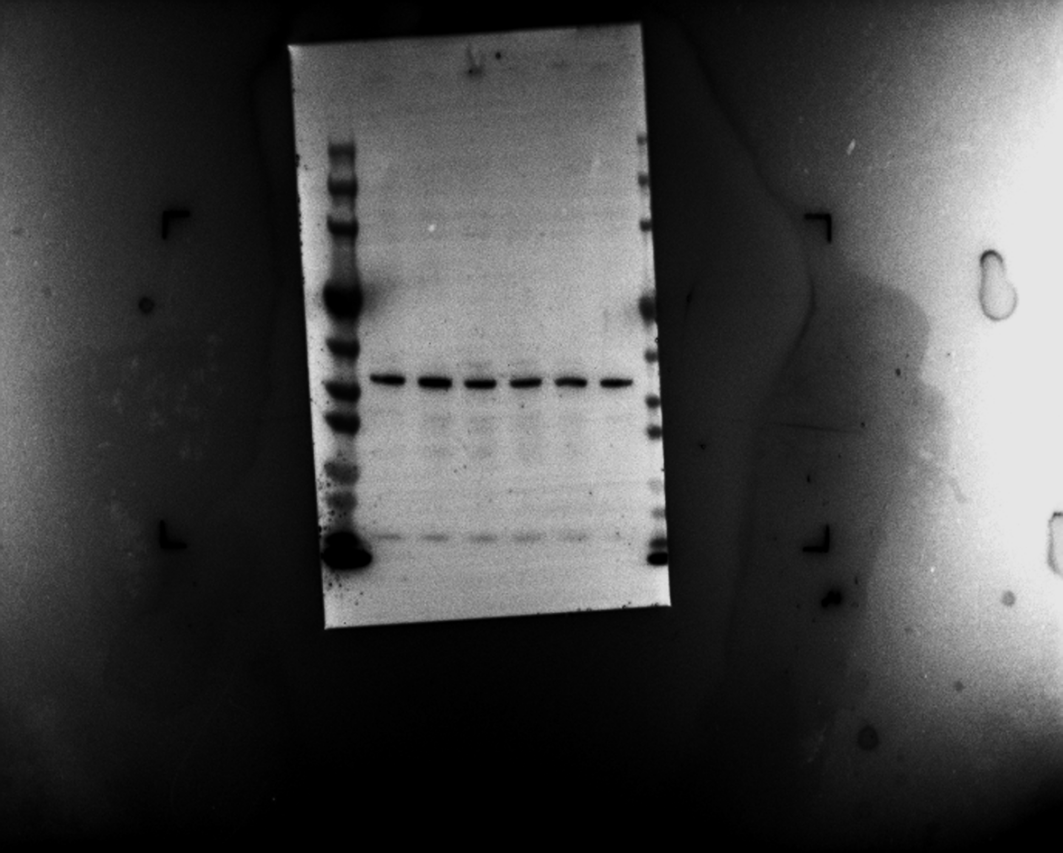
**

Target protein bands are shown in the left panel, and β-actin (loading control) bands are shown in the right panel. In each panel, the three left lanes represent the control group, and the three right lanes represent the experimental group.
